# Supplementary material for: CAR-T Engager Proteins Optimize Anti-CD19 CAR-T Cell Therapies for Lymphoma
Source: bioRxiv or medRxiv preprint supplement (doi:10.1101/2022.05.30.494010), 2022-05-30

**Supplemental Figure 3.** Excess CTE-19.20-RG protein does not interfere with direct CAR-19 cytotoxicity. CAR-19-mediated killing of JeKo-1 cells was evaluated plus or minus CTE-19.20 protein addition at a) E:T ratio of 3:1 and B) E:T ratio of 1:1. CAR T cells were 78% CAR-positive).

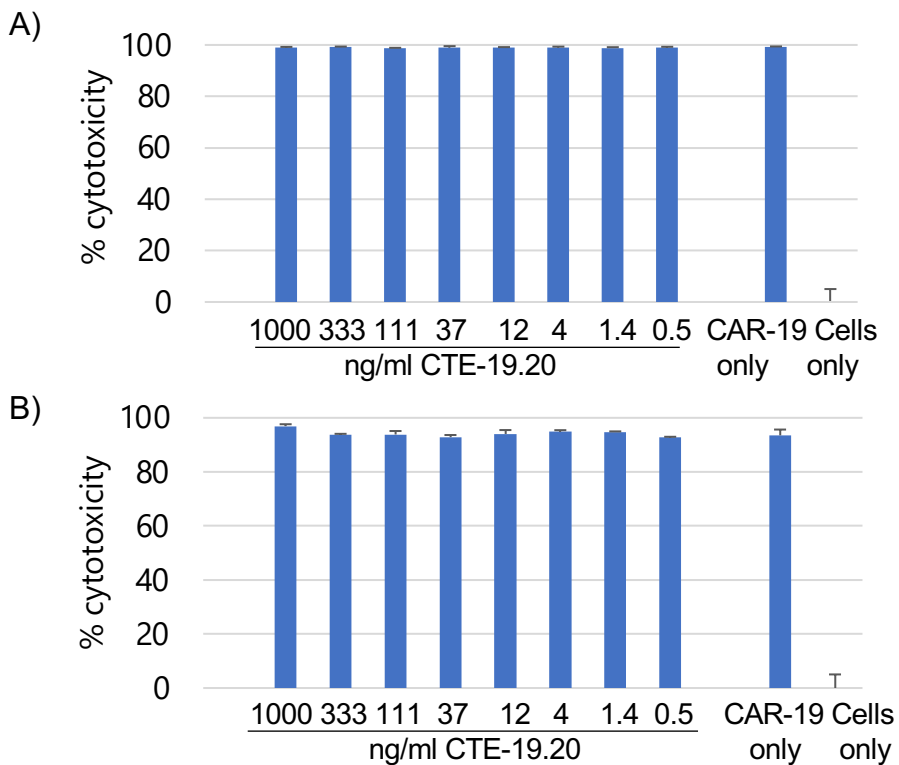

Supplement: Supplementary file [file media-3.pdf]
