# Supplementary material for: CAR-T Engager Proteins Optimize Anti-CD19 CAR-T Cell Therapies for Lymphoma
Source: bioRxiv or medRxiv preprint supplement (doi:10.1101/2022.05.30.494010), 2022-05-30

**Supplemental Figure 4.** CTE-19.20 protein binding does not induce CD20 downregulation. A) 1  $\mu\text{g/ml}$  of CTE-19.20-His was incubated for varying amount of time with JeKo-19KO cells at 4°C (control) or 37°C (test). The cells were washed once and stained with anti-CD19 antibody. B) Mean fluorescence intensity (MFI) of CD19 detection increased during incubation at 37° from 15 minute to 6 hours.

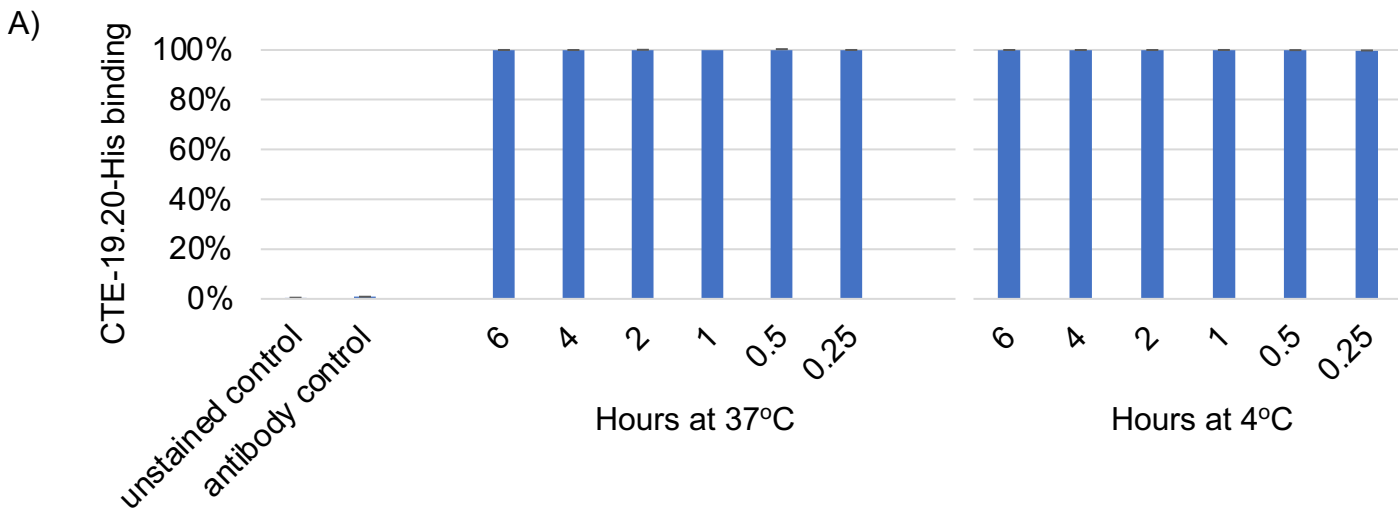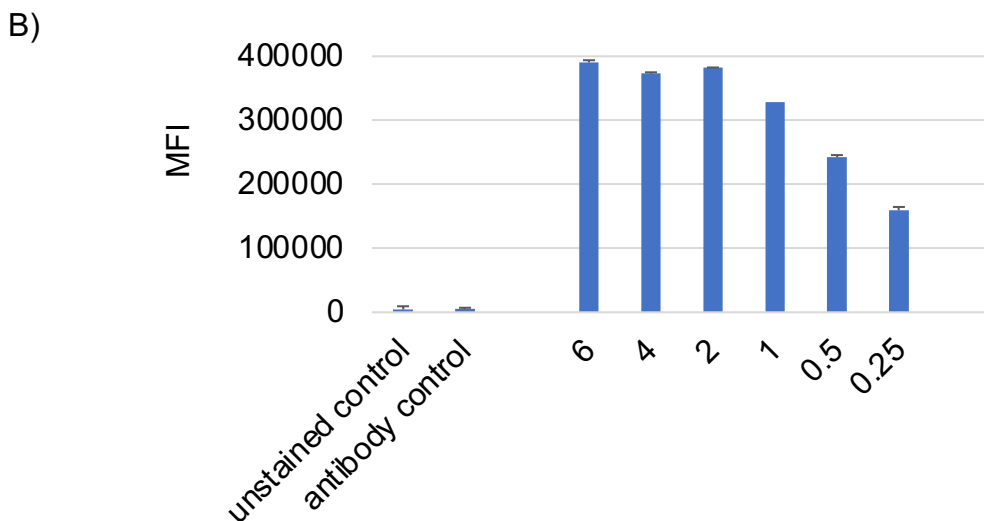

Supplement: Supplementary file [file media-4.pdf]
