# Supplementary material for: CAR-T Engager Proteins Optimize Anti-CD19 CAR-T Cell Therapies for Lymphoma
Source: bioRxiv or medRxiv preprint supplement (doi:10.1101/2022.05.30.494010), 2022-05-30

**Supplemental Figure 6.** Binding of CTE-19.20-His to murine and human antigens. A) 293T cells transfected with murine CD20 cDNA express mCD20 as assessed using an anti-mCD20 antibody (left) but do not bind to CTE-19.20 across a range of concentrations from 2 to 0.02  $\mu\text{g/ml}$ . B) The positive control samples using 293 T cells transfected with human CD20 are shown. C) CTE-19.20-His protein binds to murine albumin in an ELISA assay.

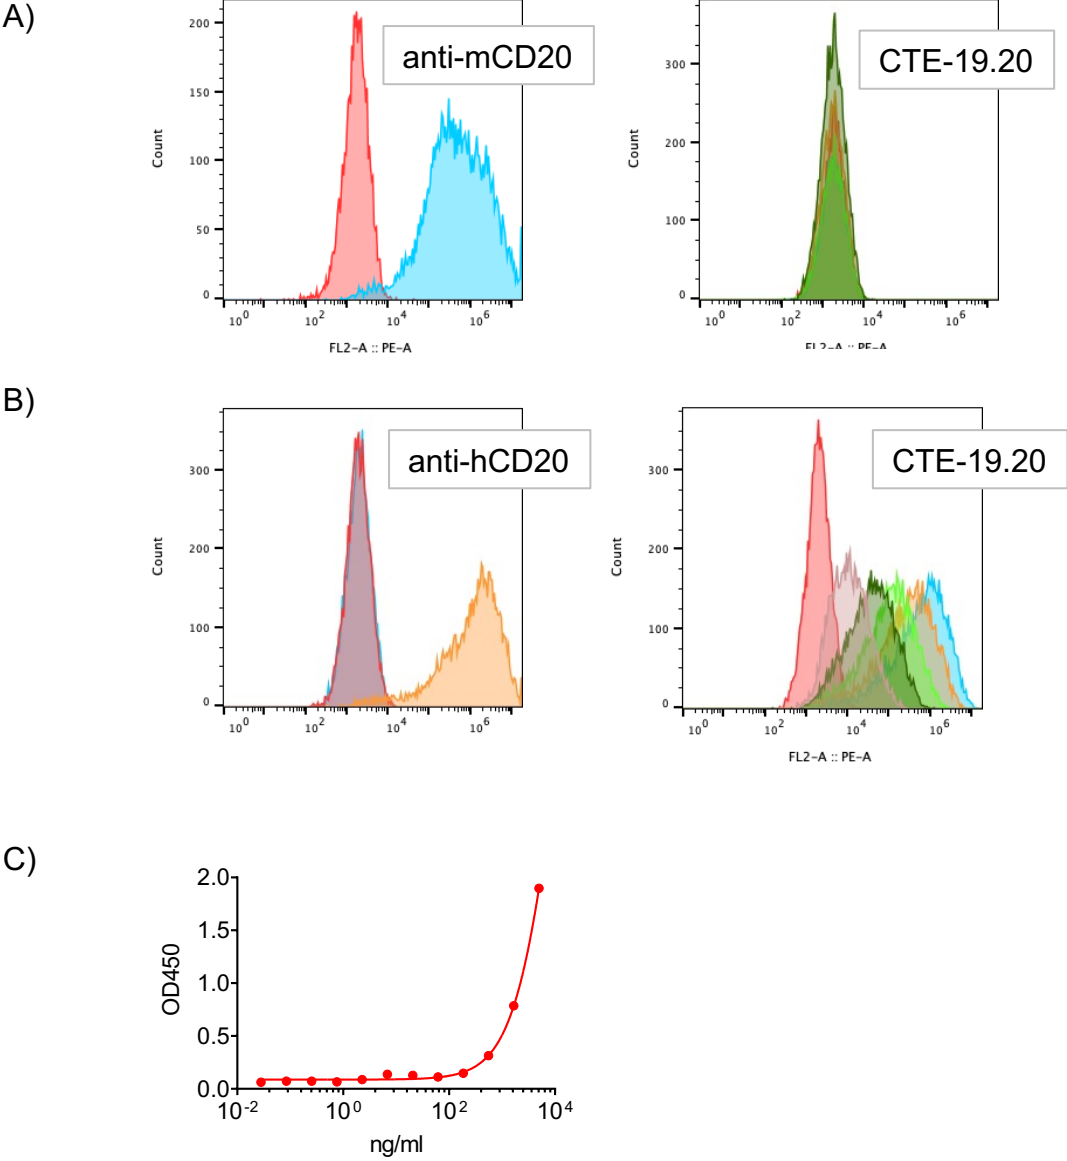

Supplement: Supplementary file [file media-6.pdf]
