# Supplementary material for: CAR-T Engager Proteins Optimize Anti-CD19 CAR-T Cell Therapies for Lymphoma
Source: bioRxiv or medRxiv preprint supplement (doi:10.1101/2022.05.30.494010), 2022-05-30
Supplement: Supplementary file [file media-7.pdf]

**Supplemental Table 1.** Expression of anti-CD19 CAR domains and the CD8 cell surface protein on lentivirus-transduced T cells from two representative donor cell transductions, and cytotoxic activity of the resulting CAR-19 T cells against JeKo-1 cells that express CD19.

| Donor #   | Expression |        | Cytotoxicity |         |           |
|-----------|------------|--------|--------------|---------|-----------|
|           | % CAR+     | % CD8+ | E:T 3:1      | E:T 1:1 | E:T 0.3:1 |
| <b>18</b> | 84.6       | 59.4   | 99.2         | 96.5    | 77.1      |
| <b>45</b> | 81.4       | 58.3   | 99.5         | 97.7    | 85.1      |
